# Supplementary material
Source: HighWire-hosted journal article supplement (https://jnm.snmjournals.org/highwire/filestream/95163/field_highwire_adjunct_files/0/192245_Supplemental_Data.pdf)

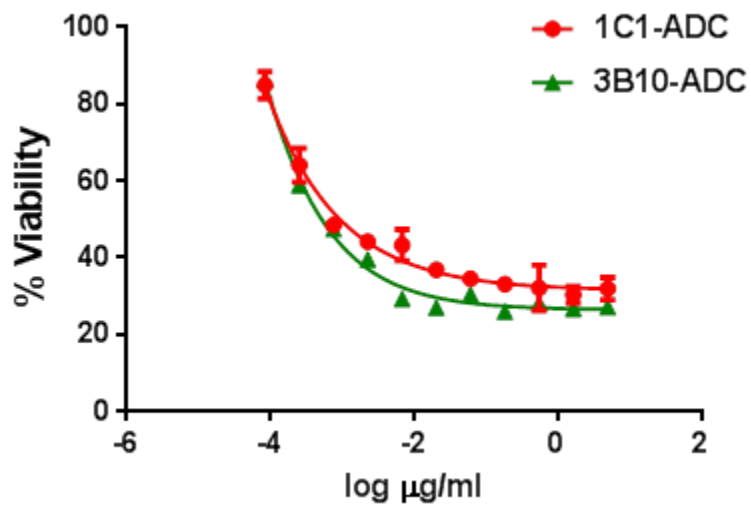

Supplemental Figure 1

**A**

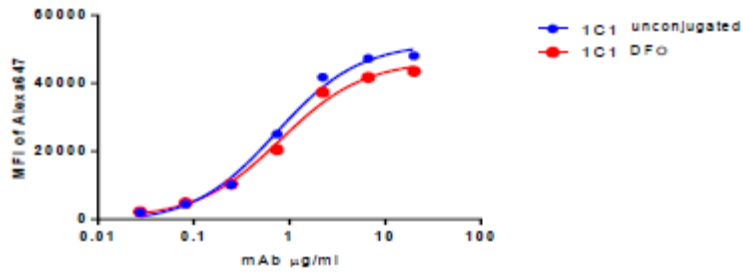

**B**

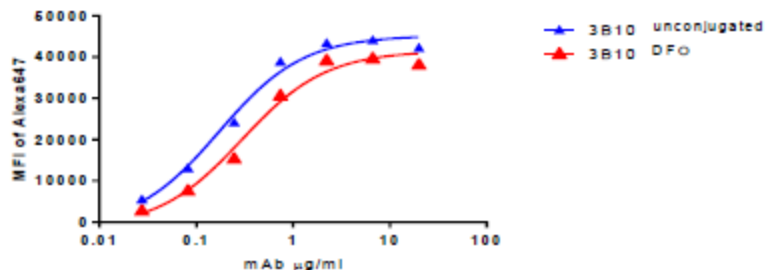

**C**

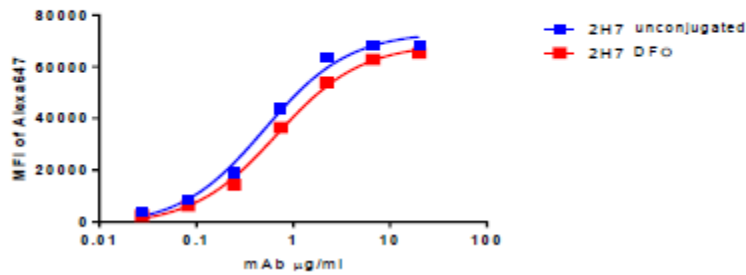

Supplemental Figure S2

Supplement: 192245_Supplemental_Data.pdf [file 192245_Supplemental_Data.pdf]
